# Supplementary material
Source: Springer Nature journal article supplement (https://www.springermedizin.de/resource/supplementary/12969_2008_365_MOESM4_ESM.pdf/9592880)
Supplement: MOESM4 [file 9592880]

**Table .4 Cartilage thickness measurements for left and right extremity in the five examined joints in 74 healthy children – systematic and random variation**

|              | <b>Systematic variation</b><br>(between left and right extremities) * | <i>p</i> | <b>Random Variation</b><br>* |
|--------------|-----------------------------------------------------------------------|----------|------------------------------|
|              | Cartilage Thickness<br>Mean difference in mm <sup>o</sup>             |          | SD in mm                     |
| <b>Knee</b>  | 0.029                                                                 | 0.333    | 0.06                         |
| <b>Ankle</b> | 0.020                                                                 | 0.348    | 0.00                         |
| <b>Wrist</b> | -0.013                                                                | 0.756    | 0.00                         |
| <b>MCP</b>   | -0.014                                                                | 0.347    | 0.00                         |
| <b>PIP</b>   | 0.011                                                                 | 0.389    | 0.10                         |

<sup>o</sup>Mean difference in mm between left and right extremities SD= standard deviation
